# Supplementary material
Source: publisher site journal article supplement (https://www.dovepress.com/article/238646)

***Supplementary Figure S1*: The chemical structure of fasudil.**

***Supplementary Figure S2*: Characterization of isolated bone marrow cells.** Fluorescence-activated cell sorting using flow cytometry identified cell populations that are positive to CD105（99.53%）、CD44（99.87%） and Sca-1（97.81%）surface markers but not to the hematopoietic cell marker CD11b（0.12%）、CD34（0.42%） and CD45（0.15%）, which are consistent with the characteristics of BMSCs.

***Supplementary Figure S1: The chemical structure of fasudil.***


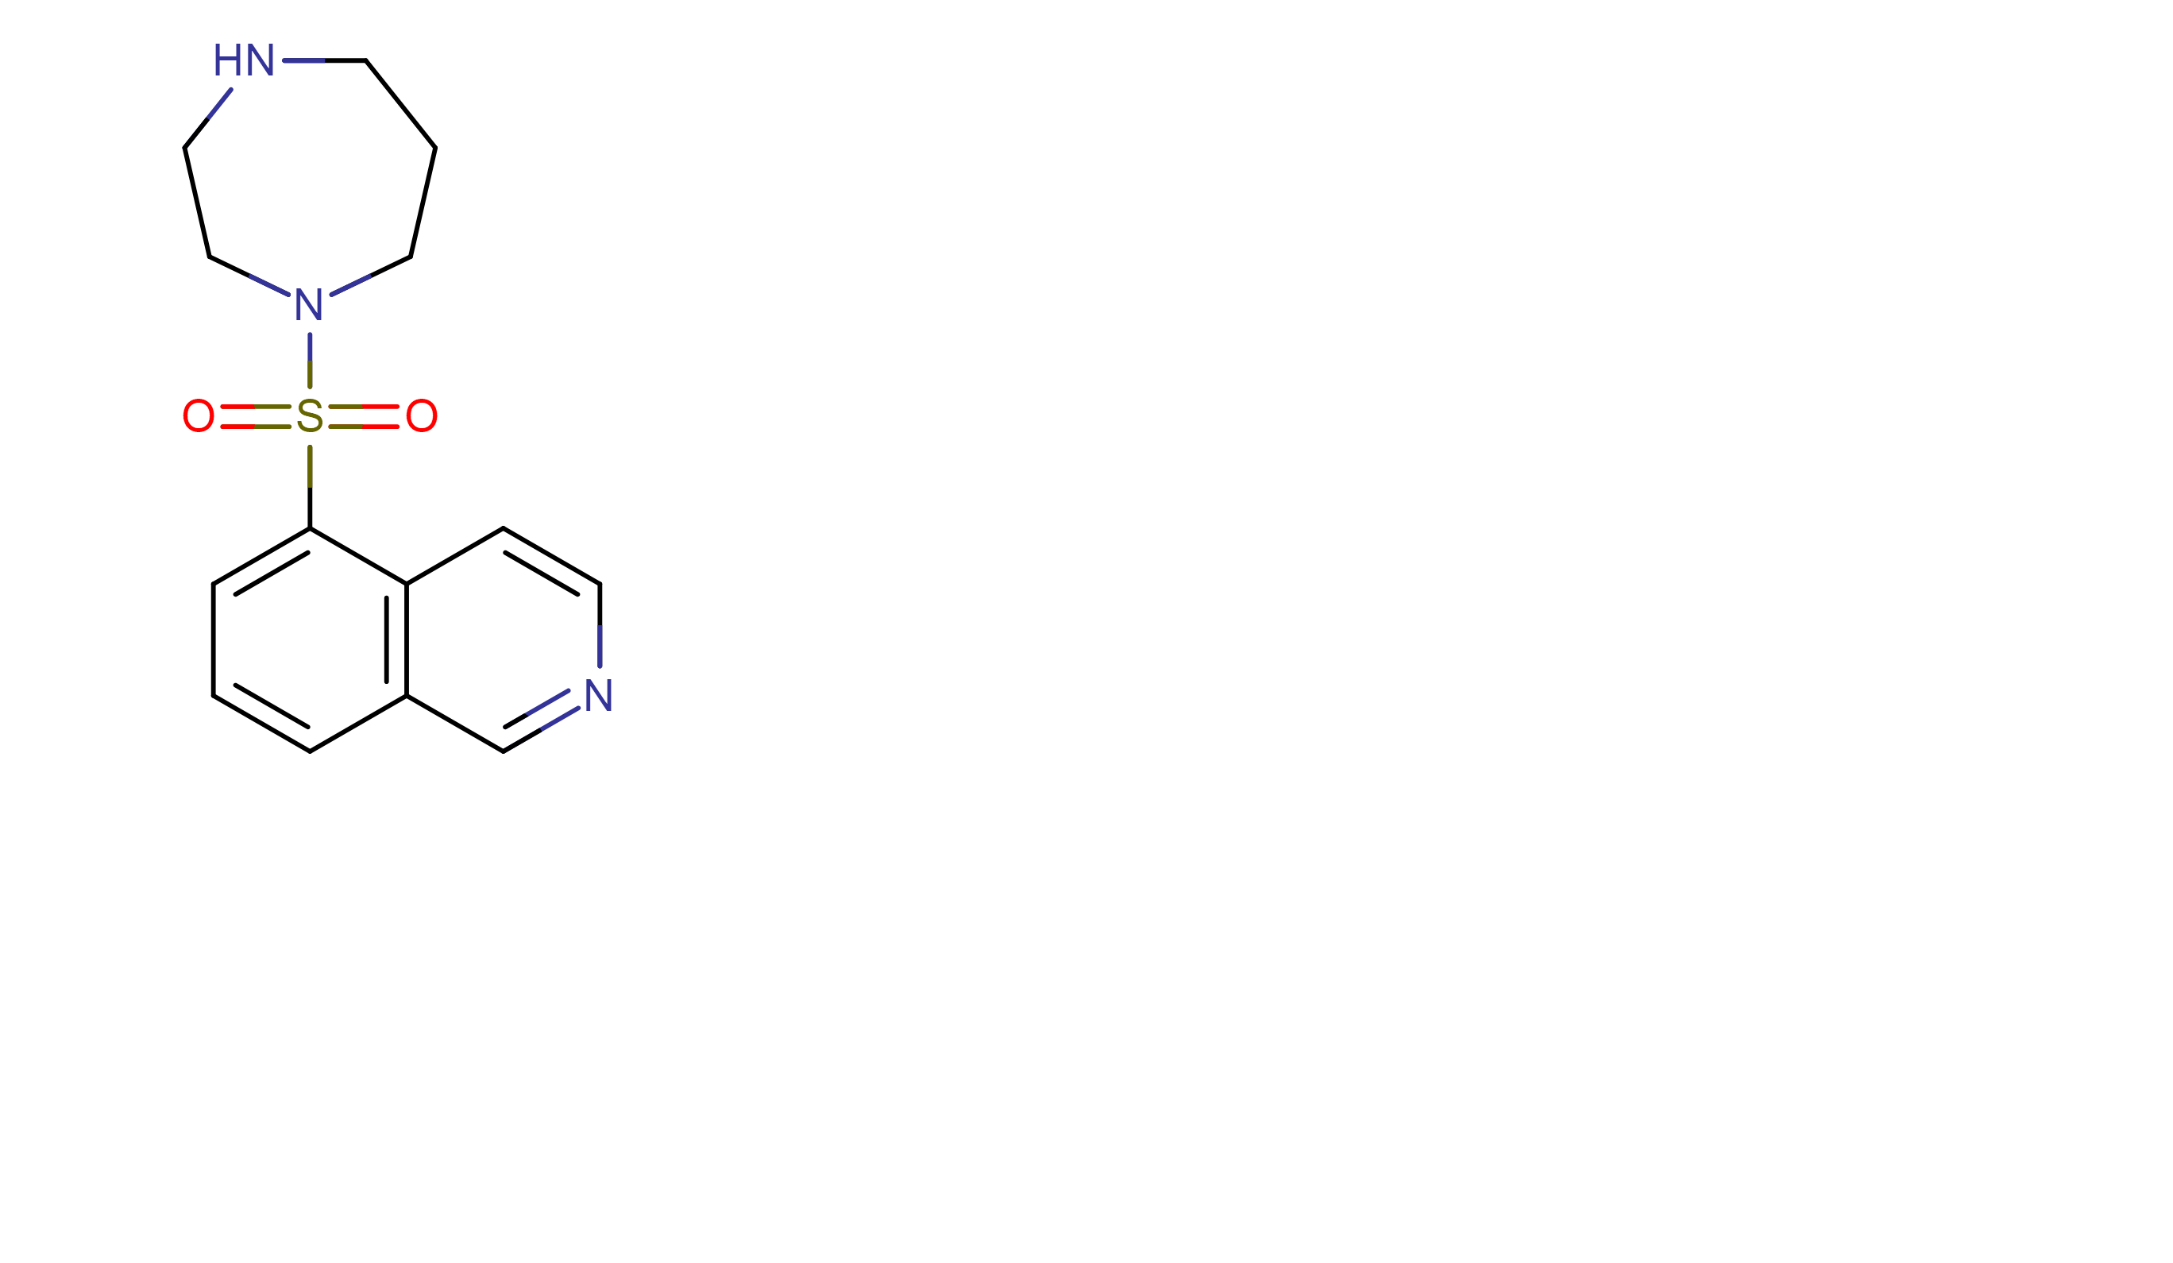


***Supplementary Figure S2*: Characterization of isolated bone marrow cells.**


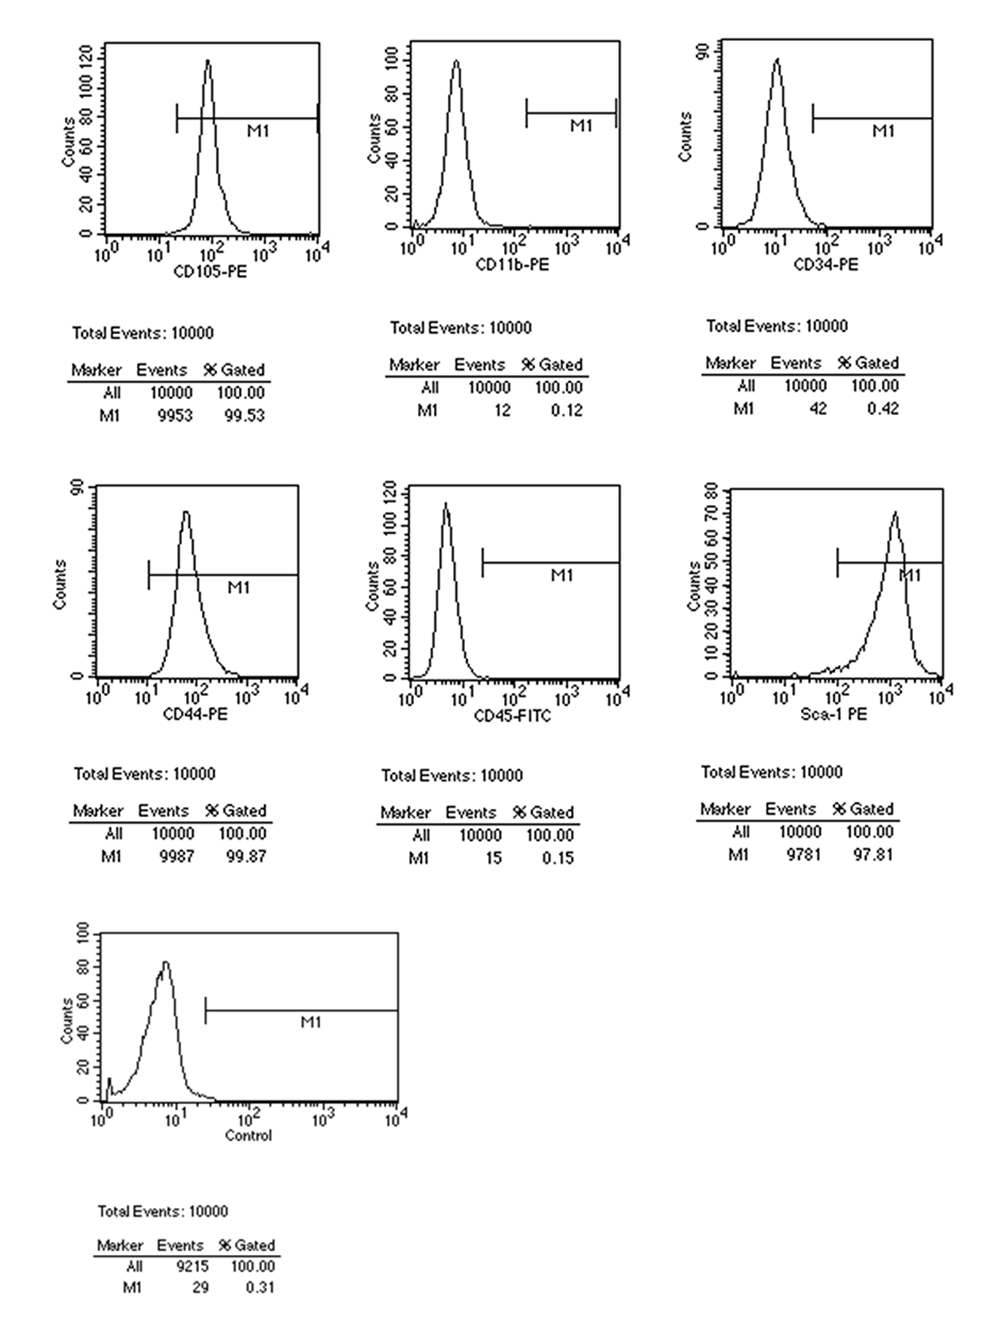

Supplement: Supplementary file 1 [file get_supplementary_file.php]
